# Supplementary material
Source: ML conference proceedings conference paper supplement (https://openreview.net/forum?id=CmqNia1tLK)
Supplement: supplementary_material [file attachment]

# FOCUS - Multi-View Foot Reconstruction from Synthetically Trained Dense Correspondences

## Supplementary Material

### 9. Further examples

**Synthetic dataset.** In Figure 9, we show additional samples of our synthetic dataset.

**In-the-wild predictions.** In Figure 10, we show further qualitative predictions of our TOC and normal predictions on in-the-wild images.

**Reconstruction.** In Figure 11, we show further qualitative reconstruction comparison to existing methods FOUND [13] and COLMAP [32, 33].

### 10. Method hyperparameters

We define the hyperparameters used for FOCUS-SfM in Table 5.

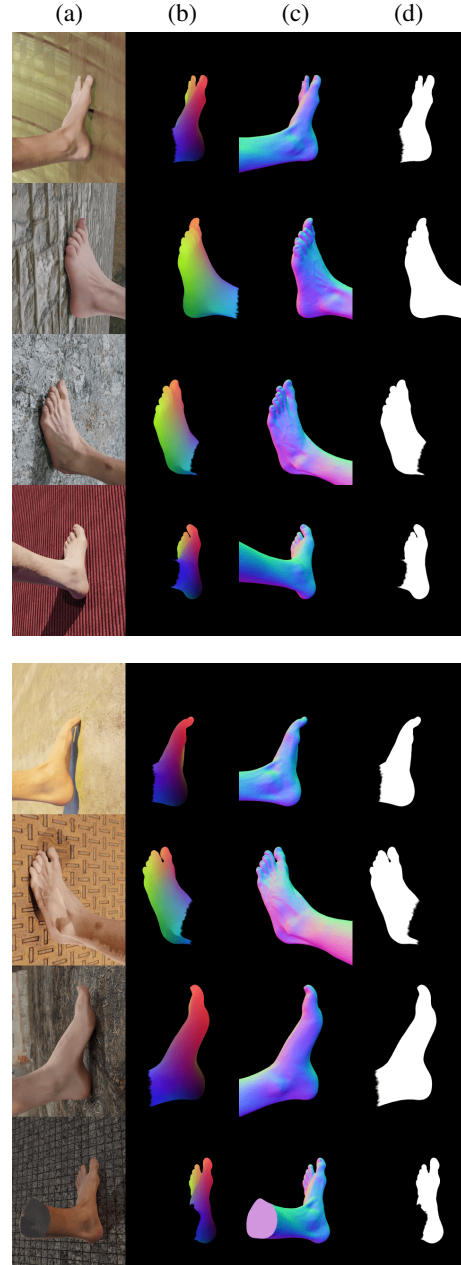

Figure 9. **SynFoot2 examples.** Further examples of SynFoot2, showing (a) RGB, (b) TOC, (c) surface normals, and (d) segmentation masks.

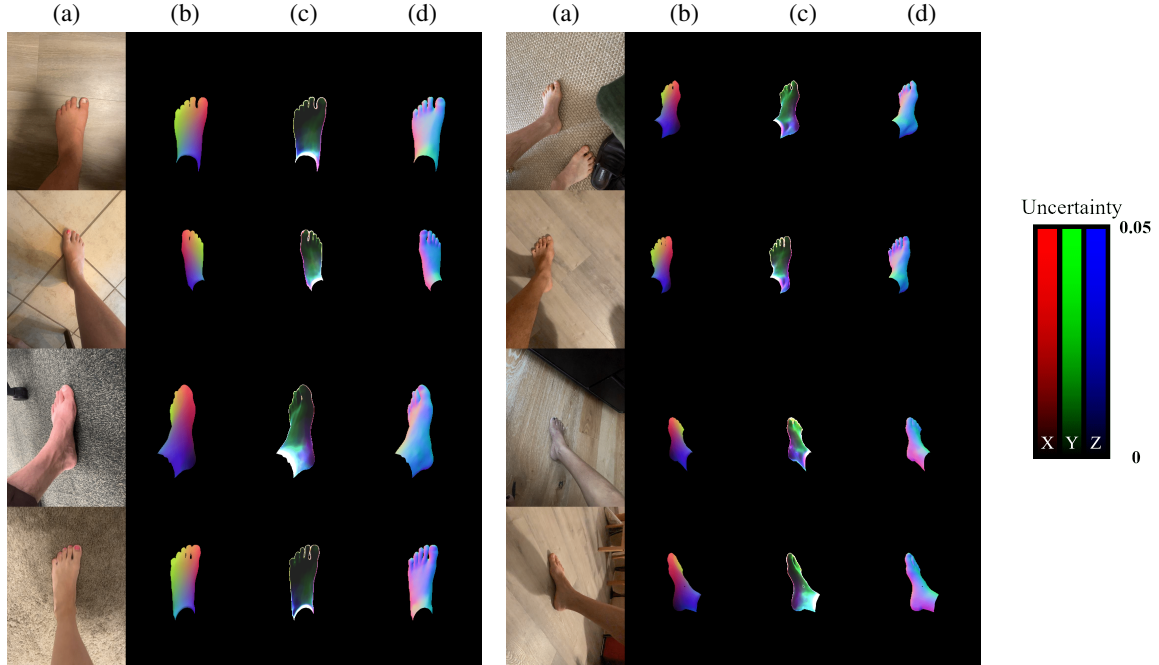

Figure 10. **In-the-wild predictions.** Further examples of in-the-wild predictions of our TOC predictor, showing showing (a) RGB input, (b) TOC  $t$ , (c) TOC uncertainty  $\sigma_t$ , and (d) surface normals. We show some more challenging examples in the right figure, even showing robustness to a secondary foot in the image.

| Description                                                    | Value    | Unit   |
|----------------------------------------------------------------|----------|--------|
| Number of samples taken per image                              | 3000     | -      |
| Maximum $\ell_2$ distance to consider a correspondence a match | 0.002    | -      |
| Upsampling factor for subpixel matching                        | 8        | -      |
| Reprojection error above which to filter triangulated points   | 3        | pixels |
| Crop the mesh to this padding around reconstructed point cloud | 1        | mm     |
| Foot mesh height interval                                      | [0, 150] | mm     |
| Poisson reconstruction - depth                                 | 8        | -      |
| Poisson reconstruction - iterations                            | 8        | -      |

Table 5. Hyperparameters chosen for FOCUS-SfM.

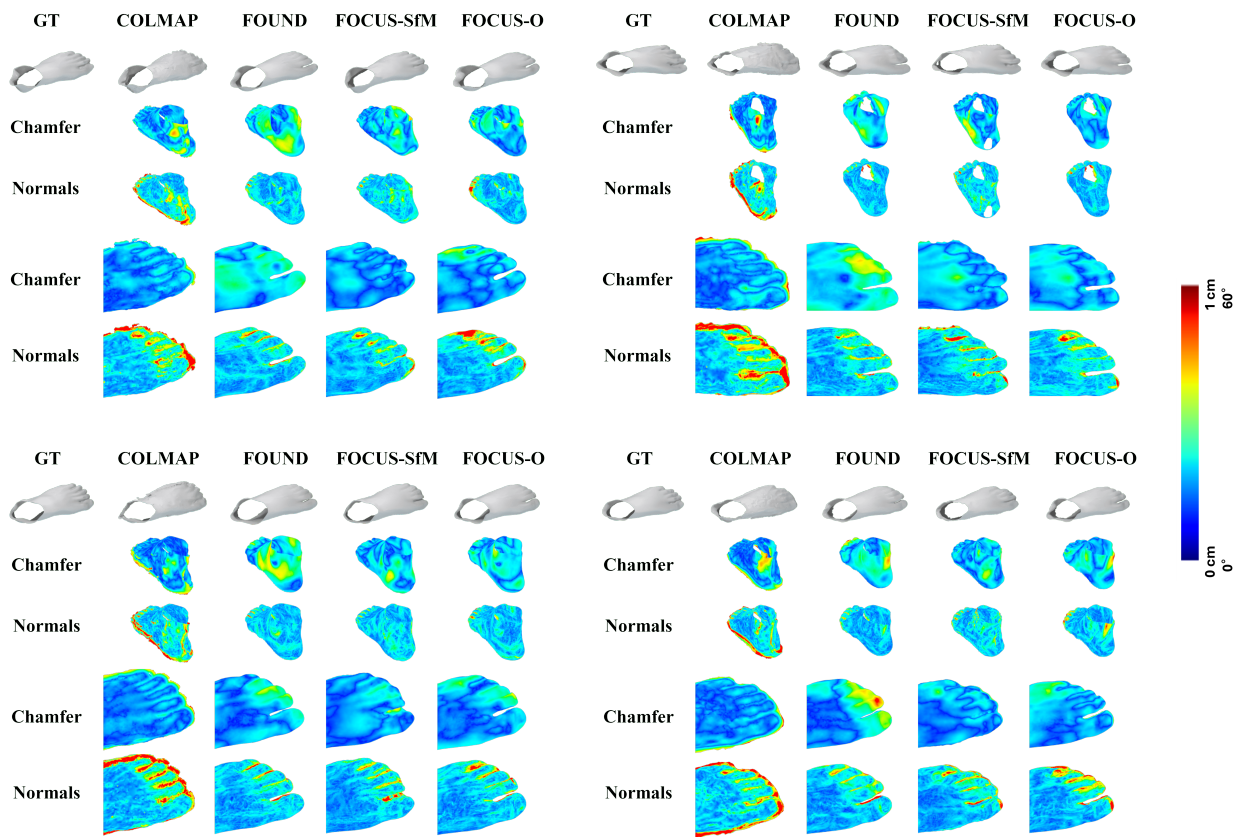

Figure 11. **Qualitative reconstruction results.** The reconstruction quality is compared across four further scans in the Foot3D dataset, comparing COLMAP, FOUND, FOCUS-SfM and FOCUS-O.
